# Supplementary material for: Rapid quality evaluation of Chinese herbal medicines using a miniature mass spectrometer: Lygodium japonicum (Thunb.) Sw. as an example
Source: Royal Society of Chemistry journal article supplement (doi:10.1039/d2ay01769e), 2022-12-13
Supplement: d2ay01769e1.pdf [file d2ay01769e1.pdf]

1

2

## Supporting Information

3

### **Rapid Quality Evaluation of Chinese Herbal Medicines Using a Miniature Mass Spectrometer: *Lygodium japonicum* (Thunb.) Sw. as An Example**

4

5

6

7

8 Xuan Gu<sup>a[+]</sup>, Shanshan Jia<sup>b[+]</sup>, Wangmin Hu<sup>b</sup>, Mengdi Cui<sup>b</sup>, Yaru Cao<sup>b</sup>, Junling Hou<sup>b</sup>, Rufeng

9

Wang<sup>\*a</sup>, Mei Zhang<sup>\*b</sup>

10

11 <sup>a</sup> School of Life Sciences, Beijing University of Chinese Medicine, Beijing 102488, China;

12 <sup>b</sup> School of Chinese Materia Medica, Beijing University of Chinese Medicine, Beijing 102488,

13 China.

14 <sup>[+]</sup> Equal contribution

15

16

17

18

19

20

21 \*Co-corresponding Authors:

22 Prof. Mei Zhang

23 meizhang@bucm.edu.cn

24

25 Prof. Rufeng Wang

26 wrf@bucm.edu.cn

28 **Outline**

29 1 Optimization of CID energy

30 2 Quantitative methodology

31 2.1 Standard curves

32 2.2 Methodology validation

33 2.3 Representative MS/MS spectra used for quantitative analysis

34

## 35 1 Optimization of CID energy

36 The miniature mass spectrometry (mini-MS) instrument used in this work supports  
37 multiple reaction monitoring (MRM) mode and therefore well supports qualitative and quantitative  
38 analysis. Each analyte precursor ion generate the corresponding product ion fragments via  
39 collision-induced dissociation (CID) in the tandem MS. For qualitative analysis, we needed to  
40 confirm that the precursor-product ion information in the MS/MS spectra of each analyte in the  
41 herbal extracts was consistent with the standards. More importantly, we use product ions for  
42 quantification to minimize the interference of isomers, so we need to try to make the quantified  
43 ions have higher peak intensities. As a result, we needed to carefully optimize the CID energy for  
44 each analyte. The process of CID optimization for the nine analytes is shown in Figure S1.

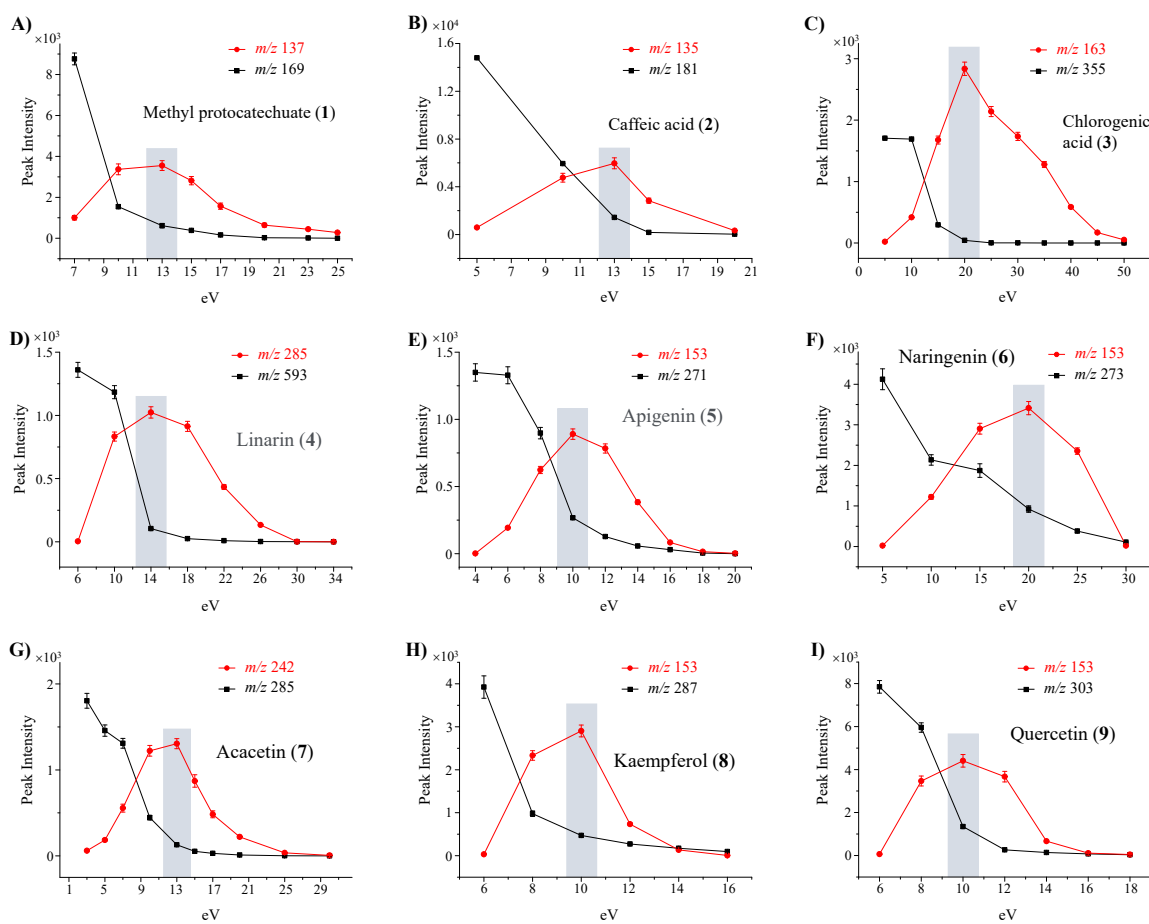

45

46

**Figure S1.** Optimization of CID energy for the nine analytes.

## 47 2 Quantitative methodology

### 48 2.1 Standard curves

49 The quantitative analysis of the analytes was performed using a standard curve method  
50 combined with the multiple reaction monitoring (MRM) strategy. The characteristic  
51 precursor/product ion pairs of the analytes were used for MRM analysis. The standard curve of  
52 each analyte was plotted with the concentration of standard solutions as the horizontal coordinate  
53 and the peak intensity of the quantitative product ion in MS/MS analysis as the vertical coordinate  
54 (Figure S2). Standard solutions were freshly made using herbal extracts without analytes as  
55 background matrices. Details of the concentration range of the standard solutions was given in  
56 Table S1.

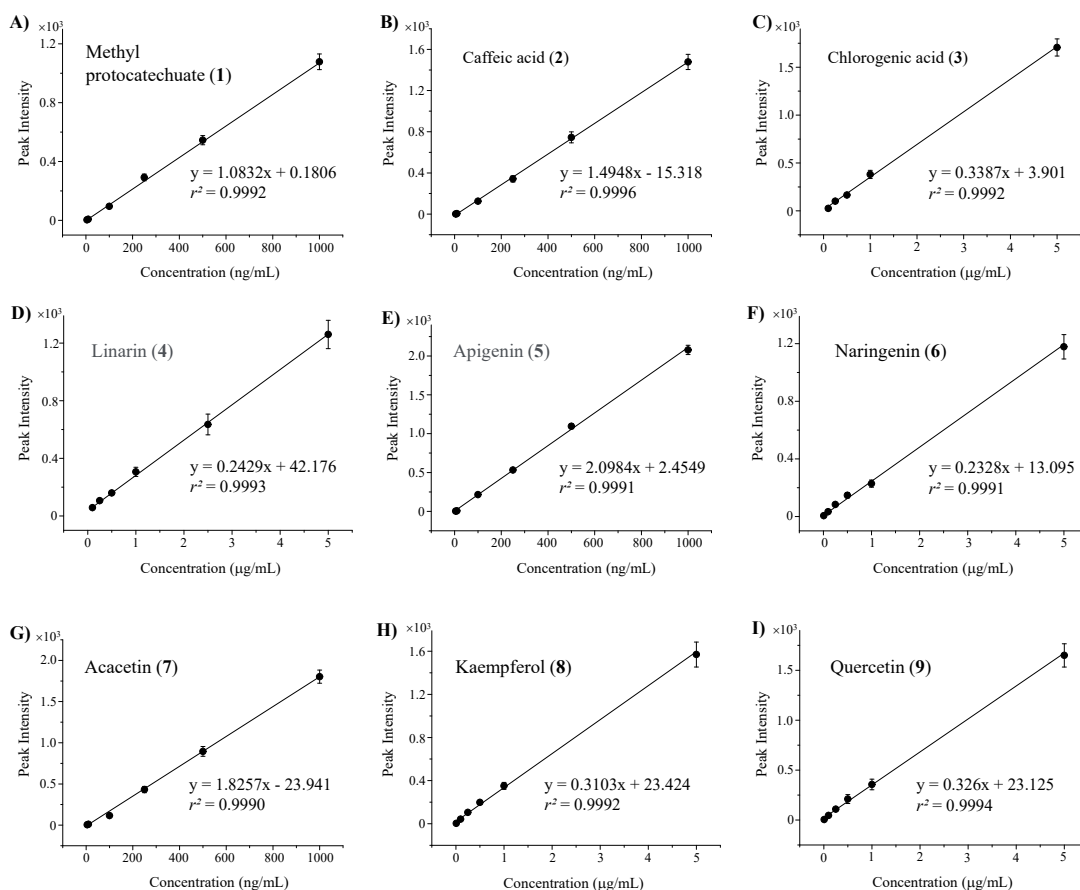

57

58

Figure S2. Standard curves for the nine analytes.

59

60

**Table S1.** Details of the concentration range of the standard solutions

| <b>Analyte</b>             | <b>Concentration range (ng/mL)</b> |
|----------------------------|------------------------------------|
| Methyl protocatechuate (1) | 5, 10, 100, 250, 500, 1000         |
| Caffeic acid (2)           | 5, 10, 100, 250, 500, 1000         |
| Chlorogenic acid (3)       | 100, 250, 500, 1000, 2500, 5000    |
| Linarin (4)                | 100, 250, 500, 1000, 2500, 5000    |
| Apigenin (5)               | 5, 10, 100, 250, 500, 1000         |
| Naringenin (6)             | 10, 100, 250, 500, 1000, 5000      |
| Acacetin (7)               | 5, 10, 100, 250, 500, 1000         |
| Kaempferol (8)             | 10, 100, 250, 500, 1000, 5000      |
| Quercetin (9)              | 10, 100, 250, 500, 1000, 5000      |

61

62

63

## 64 2.2 Methodology validation

65 The methodology of PSI-mini-MS/MS analysis was validated, including precision,  
 66 accuracy and recovery rates. Quantitative control (QC) samples of nine analytes at low/high  
 67 concentration were added to the background TCM extract (herbal extracts without these nine  
 68 compounds) for methodology validation. The background extract without spiking analytes was  
 69 used for negative samples, and each sample was detected for 5 times in 3 days as parallel  
 70 detections. The results were summarized in Table S2. It has been demonstrated that the developed  
 71 PSI-mini-MS/MS method is able to determine the nine analytes accurately and precisely in  
 72 simulated CHM extract samples.

73 **Table S2.** Precision, accuracy and recovery rates of nine analytes in background TCM extracts  
 74 based on PSI-mini-MS/MS analysis (n = 5, 3 days).

| Analyte                    | Conc. of<br>QC sample<br>(ng/mL) | Precision (RSD %) |           | Accuracy (RE %) |           | Recovery<br>rate (%) |
|----------------------------|----------------------------------|-------------------|-----------|-----------------|-----------|----------------------|
|                            |                                  | Intra-day         | Inter-day | Intra-day       | Inter-day |                      |
| Methyl protocatechuate (1) | 0.005                            | 4.3               | 4.8       | 5.3             | 5.4       | 97.4 ± 3.2           |
|                            | 1                                | 0.8               | 1.4       | 1.2             | 1.5       | 99.8 ± 1.1           |
| Caffeic acid (2)           | 0.005                            | 1.1               | 6.1       | 7.8             | 7.0       | 100.6 ± 1.2          |
|                            | 1                                | 0.5               | 0.9       | 1.2             | 0.6       | 99.8 ± 2.4           |
| Chlorogenic acid (3)       | 0.01                             | 3.1               | 5.1       | 6.0             | 6.1       | 101.6 ± 0.3          |
|                            | 5                                | 0.7               | 1.8       | 0.7             | 1.0       | 98.2 ± 1.7           |
| Linarin (4)                | 0.1                              | 3.8               | 6.0       | 4.9             | -1.6      | 96.8 ± 3.1           |
|                            | 10                               | 1.2               | 1.0       | 1.1             | 0.9       | 100.2 ± 0.9          |
| Apigenin (5)               | 0.005                            | 4.1               | 7.7       | 6.9             | 7.8       | 101.7 ± 1.2          |
|                            | 1                                | 1.2               | 1.9       | 1.0             | 1.2       | 100.7 ± 2.1          |
| Naringenin (6)             | 0.01                             | 6.1               | 7.8       | 6.8             | 8.3       | 100.2 ± 0.9          |
|                            | 5                                | 1.4               | 2.0       | 1.4             | 1.1       | 96.3 ± 2.2           |
| Acacetin (7)               | 0.005                            | 3.2               | 3.2       | 3.9             | 7.8       | 98.1 ± 2.4           |
|                            | 1                                | 2.5               | 1.2       | 2.1             | 1.5       | 100.6 ± 1.5          |
| Kaempferol (8)             | 0.01                             | 3.7               | 4.1       | 3.2             | 6.2       | 96.3 ± 3.1           |
|                            | 5                                | 1.1               | 1.3       | 1.2             | 2.0       | 99.8 ± 1.1           |
| Quercetin (9)              | 0.01                             | 1.9               | 3.5       | 1.3             | 2.9       | 94.2 ± 2.9           |
|                            | 5                                | 0.2               | 1.5       | 0.6             | 1.1       | 95.1 ± 2.1           |

75

76

77

## 78 2.3 Representative MS/MS spectra used for quantitative analysis

79 PSI-mini-MS/MS was used to analyze the nine effective components in the extracts of  
80 each species of *Lygodium*. The nine target components are present in all three species of *Lygodium*,  
81 but in different amounts. Taking chlorogenic acid (**3**) as an example, Figure S3 showed the MS/MS  
82 spectra for the detection of chlorogenic acid (**3**) in *Lygodium* extracts of three different species.  
83 This showed that chlorogenic acid (**3**) is present in different species of *Lygodium* at different levels.  
84 The other eight analytes were quantified using similar methods.

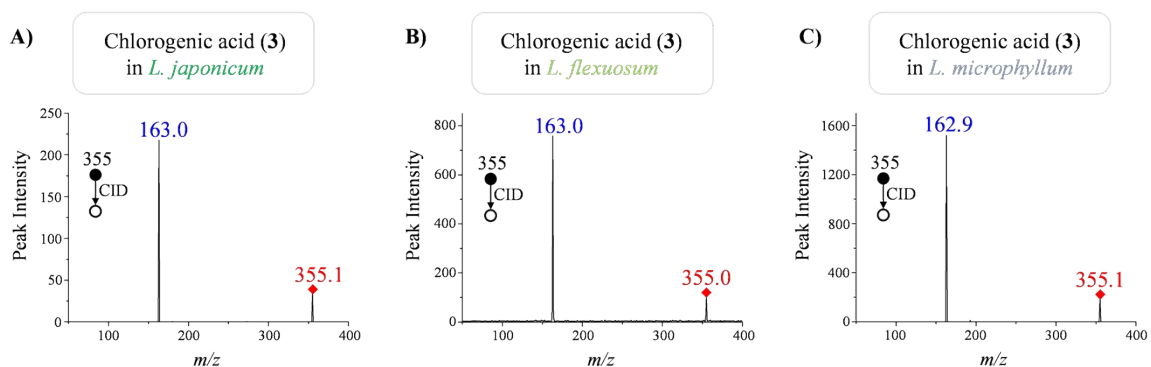

85

86 **Figure S3.** MS/MS spectra of chlorogenic acid (**3**) in *Lygodium* extracts of three different  
87 species.
