# Supplementary figures and images for: Rapid quality evaluation of Chinese herbal medicines using a miniature mass spectrometer: Lygodium japonicum (Thunb.) Sw. as an example
Source: Royal Society of Chemistry journal article supplement (doi:10.1039/d2ay01769e), 2022-12-13

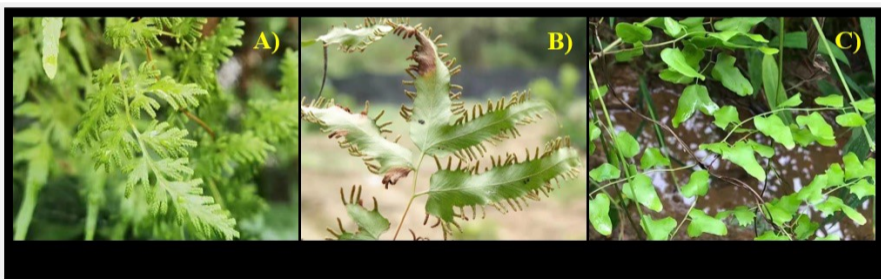

Supplement: d2ay01769e2.pdf [file d2ay01769e2.pdf]

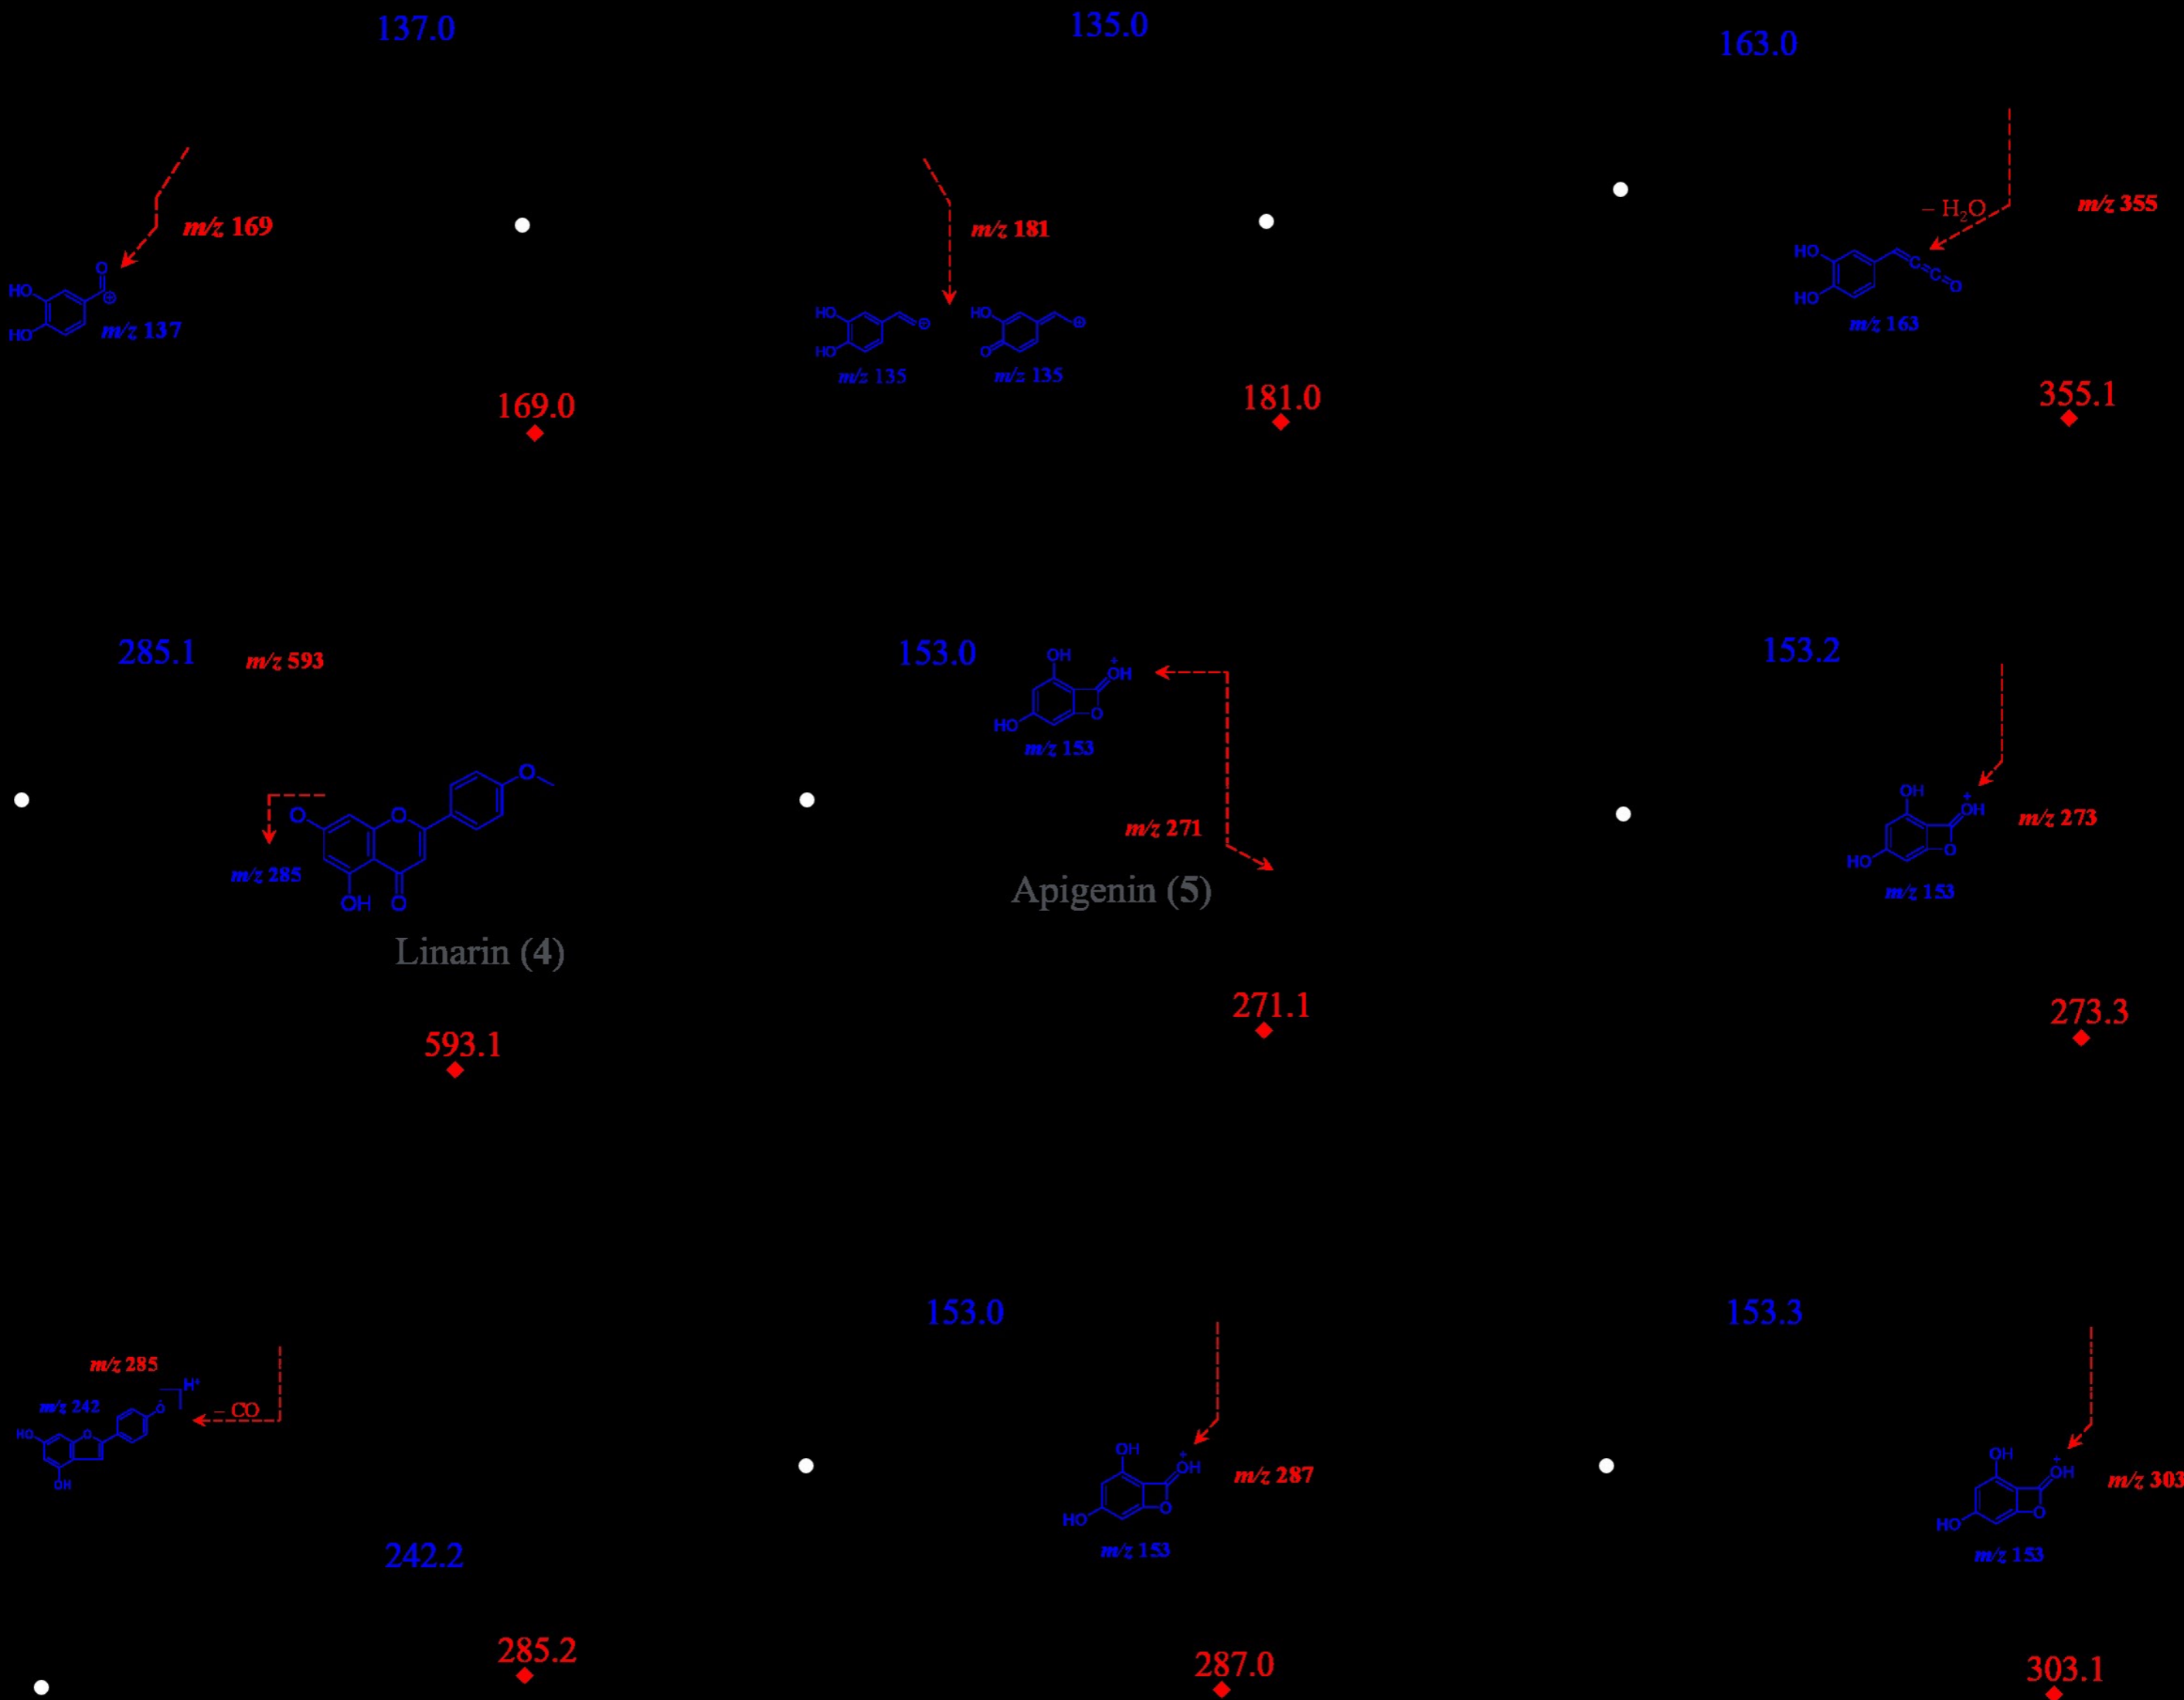

Supplement: d2ay01769e3.pdf [file d2ay01769e3.pdf]
